# Supplementary material for: Association between Urinary Metabolites and the Exposure of Intensive Care Newborns to Plasticizers of Medical Devices Used for Their Care Management
Source: MDPI journal article supplement (doi:10.3390/metabo11040252), 2021-04-19

**Supplementary file 1.** Characteristics of patients enrolled in the ARMED study.

|                                                                                                   |        | Center 1                  | Center 2                  | Total                     |
|---------------------------------------------------------------------------------------------------|--------|---------------------------|---------------------------|---------------------------|
| <b>Number of patients enrolled</b>                                                                |        | 53                        | 51                        | 104                       |
| <b>Sexe ratio (M/F)</b>                                                                           |        | 35/18                     | 28/23                     | 63/41                     |
| <b>Gestational age</b><br>(weeks of amenorrhea ; mean±sd ;<br>median [25th and 75th percentiles]) |        | 36.1±4.2<br>37 [33-40]    | 36.4±4.5<br>38 [34.5-39]  | 36.2±4.3<br>38 [34-39]    |
| <b>Birth weight (kg)</b><br>(kg ; mean±sd ; median [25th and 75th<br>percentiles])                |        | 2.6±0.9<br>2.7 [1.87-3.2] | 2.9±0.8<br>2.91 [2.3-3.5] | 2.7±0.9<br>2.79 [2.2-3.4] |
| <b>Length of study<br/>participation</b>                                                          | 1 day  | 53 (100%)                 | 51 (100%)                 | 104 (100%)                |
|                                                                                                   | 2 days | 51 (94%)                  | 34 (67%)                  | 85 (82%)                  |
|                                                                                                   | 3 days | 43 (81%)                  | 27 (53%)                  | 70 (67%)                  |
|                                                                                                   | 4 days | 33 (62%)                  | 19 (37%)                  | 52 (50%)                  |
|                                                                                                   | 5 days | 27 (51%)                  | 8 (16%)                   | 35 (34%)                  |
|                                                                                                   | 6 days | 21 (40%)                  | 5 (10%)                   | 26 (25%)                  |

**Supplementary file 2.** Median urinary levels of Cx-MINP before and after transfusion of patients transfused in center 1. Cx-MINP urinary concentrations (ng/μmol creatinine) of patients from center 1 before and after transfusion sessions (except if a transfusion session was performed on Day 1).

| <i><b>Patient number</b></i> | <i><b>Study day</b></i> | <i><b>Cx-MeMINP before the<br/>transfusion session at<br/>the study day</b></i> | <i><b>Cx-MeMINP after the<br/>transfusion session at<br/>the study day</b></i> |
|------------------------------|-------------------------|---------------------------------------------------------------------------------|--------------------------------------------------------------------------------|
| 01-04-001                    | 2                       | 0.280                                                                           | 2.823                                                                          |
| 01-04-001                    | 3                       | 2.823                                                                           | 2.135                                                                          |
| 01-04-004                    | 2                       | 0.660                                                                           | 0.683                                                                          |
| 01-04-007                    | 2                       | 0.486                                                                           | 0.685                                                                          |
| 01-04-023                    | 2                       | 0.440                                                                           | 3.645                                                                          |
| 01-04-023                    | 3                       | 3.645                                                                           | 21.813                                                                         |
| 01-04-034                    | 2                       | 0.730                                                                           | 2.260                                                                          |
| 01-04-035                    | 2                       | 0.405                                                                           | 2.941                                                                          |
| 01-04-035                    | 3                       | 2.941                                                                           | 18.633                                                                         |
| 01-04-035                    | 5                       | 23.954                                                                          | 22.580                                                                         |
| 01-04-037                    | 3                       | 8.169                                                                           | 12.161                                                                         |
| 01-04-045                    | 2                       | 13.600                                                                          | 17.866                                                                         |
| 01-04-059                    | 4                       | 17.713                                                                          | 101.886                                                                        |

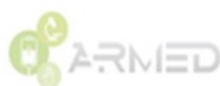

Date : \_\_/\_\_/\_\_

Jour d'étude : J1

Volume d'urines collecté sur 24 heures : ml

Clairance à la créatinine (Cockcroft) : ml/min

Nom de l'enquêteur :

Fonction :

☐ Photothérapie : si oui, durée \_\_h

☐ Incubateur (☐ fermé ☐ ouvert)

### Recensement des situations cliniques

☐ DIALYSE (☐ HD ☐ HF ☐ HDF)

☐ CEC ☐ ECMO ☐ ECLS

☐ NUTRITION PARENTÉRALE

☐ PLASMAPHÉRÈSE

☐ NUTRITION ENTÉRALE

### Recensement des DMs utilisés

| PERFUSEURS                                                                                                                                                                                                                          |             |                |                   |
|-------------------------------------------------------------------------------------------------------------------------------------------------------------------------------------------------------------------------------------|-------------|----------------|-------------------|
| Modèle                                                                                                                                                                                                                              | Fournisseur | Heures de pose | Heures de retrait |
| <input type="checkbox"/> Perfusend L86-P (perfuseur simple)                                                                                                                                                                         | SENDAL      | __h__          | __h__             |
| <input type="checkbox"/> VLST00 (pompe Volumat)                                                                                                                                                                                     | LÉPINE      | __h__          | __h__             |
| <input type="checkbox"/> AX02SF (pompe Alaris)                                                                                                                                                                                      | SENDAL      | __h__          | __h__             |
| <input type="checkbox"/> KIS 1X (simple)                                                                                                                                                                                            | DORAN       | __h__          | __h__             |
| TRANSFUSEURS                                                                                                                                                                                                                        |             |                |                   |
| <input type="checkbox"/> Transfusend (transfuseur simple)                                                                                                                                                                           | SENDAL      | __h__          | __h__             |
| <input type="checkbox"/> 41403 (transfuseur avec mesurette)                                                                                                                                                                         | SLB MEDICAL | __h__          | __h__             |
| PROLONGATEURS                                                                                                                                                                                                                       |             |                |                   |
| <input type="checkbox"/> Biocath opaque PO3115 (L150cm)                                                                                                                                                                             | CAIR        | __h__          | __h__             |
| <input type="checkbox"/> Biocath PB3315M (2,5mm ; L150cm Exsanguinotransfusion)                                                                                                                                                     | CAIR        | __h__          | __h__             |
| <input type="checkbox"/> Biocath PB31xxxM                                                                                                                                                                                           | CAIR        | __h__          | __h__             |
| <input type="checkbox"/> 3101M (L10cm) <input type="checkbox"/> 3102M (L25cm) <input type="checkbox"/> 3105M <input type="checkbox"/> 3107M                                                                                         |             | __h__          | __h__             |
| (L50cm) <input type="checkbox"/> 3110M (L100cm) <input type="checkbox"/> 3115M (L150cm) <input type="checkbox"/> 3118M                                                                                                              |             | __h__          | __h__             |
| (L180cm) <input type="checkbox"/> 3120M (L200cm)                                                                                                                                                                                    |             | __h__          | __h__             |
| <input type="checkbox"/> Prolongateur avec filtre 0,2µ NEO96E                                                                                                                                                                       |             | __h__          | __h__             |
| DISPOSITIFS DE NUTRITION ENTÉRALE                                                                                                                                                                                                   |             |                |                   |
| <input type="checkbox"/> Tubulure 777015 (E-pump Kangaroo)                                                                                                                                                                          | COVIDIEN    | __h__          | __h__             |
| <input type="checkbox"/> Tubulure 777007 (E-pump Kangaroo)                                                                                                                                                                          | COVIDIEN    | __h__          | __h__             |
| Prolongateur NE Nutrisafe                                                                                                                                                                                                           | VYGON       | __h__          | __h__             |
| <input type="checkbox"/> 368152 (L150cm) <input type="checkbox"/> 368032 (L30cm) <input type="checkbox"/> 53072103 (L30cm)                                                                                                          |             | __h__          | __h__             |
| <input type="checkbox"/> Prolongateur bouton GPE ref.8884741821 (bouton Nutriport)                                                                                                                                                  | COVIDIEN    | __h__          | __h__             |
| <input type="checkbox"/> Prolongateur bouton GPE ref.012412 (bouton Mickey)                                                                                                                                                         | ASEPTINMED  | __h__          | __h__             |
| Canule de prélèvement Nutrisafe                                                                                                                                                                                                     | VYGON       | __h__          | __h__             |
| <input type="checkbox"/> 817002 <input type="checkbox"/> 817202 (L20cm ; lait) <input type="checkbox"/> 817302 (L30cm) <input type="checkbox"/> 817052 (L5cm ; médicament)                                                          |             | __h__          | __h__             |
| DISPOSITIFS DE RÉANIMATION                                                                                                                                                                                                          |             |                |                   |
| CANULES DE TRACHÉOTOMIE                                                                                                                                                                                                             |             |                |                   |
| Shiley                                                                                                                                                                                                                              | COVIDIEN    | __h__          | __h__             |
| - Pédiatriques ss ballonnet : <input type="checkbox"/> 3.0 PED <input type="checkbox"/> 3.5 PED <input type="checkbox"/> 4.0 PED <input type="checkbox"/> 4.5 PED <input type="checkbox"/> 5.0 PED <input type="checkbox"/> 5.5 PED |             |                |                   |
| - Pédiatriques avec ballonnet : <input type="checkbox"/> 4.0 PDC <input type="checkbox"/> 4.5 PDC <input type="checkbox"/> 5.0 PDC <input type="checkbox"/> 5.5 PDC                                                                 |             |                |                   |

**Supplementary file 4.** Apparent diffusion ability,  $D_{app}$  (cm/min) of each plasticizer.

|           | DEHP                 | DEHT                 | DINP                 | DINCH                |
|-----------|----------------------|----------------------|----------------------|----------------------|
| $D_{app}$ | $4.04 \cdot 10^{-7}$ | $5.69 \cdot 10^{-8}$ | $9.34 \cdot 10^{-7}$ | $2.06 \cdot 10^{-7}$ |

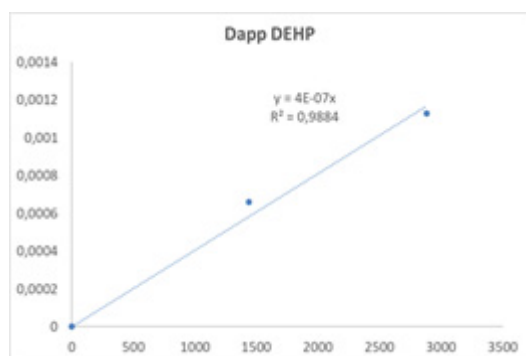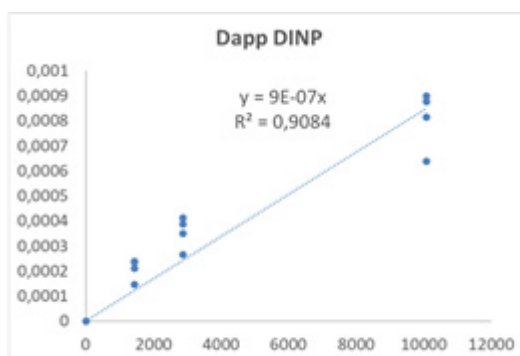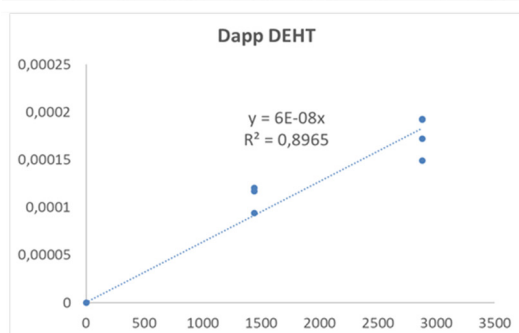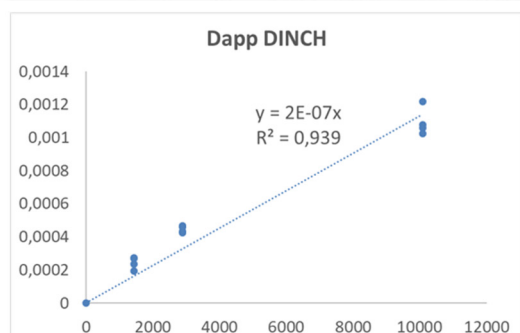

Supplement: s1 [file s1]
